# Supplementary material
Source: ML conference proceedings conference paper supplement (https://openreview.net/forum?id=RuNhbvX9o9S)
Supplement: supplementary_material [file attachment]

727 **Appendix**

728 **A Additional Experimental Results**

729 **A.1 DMC**

730 Here we show additional experimental results, beginning with a full breakdown of the DMC results  
 731 for each dataset. In Figure 6 we see the zero-shot transfer performance for models trained with  
 732 random, medium and expert initial datasets, and 15 subsequent deployments. Interestingly, we see  
 733 that the medium dataset proves to be the most effective for achieving high performance, this may be  
 734 due to being more diverse than the expert dataset, which is a narrow distribution of high performing  
 735 episodes.

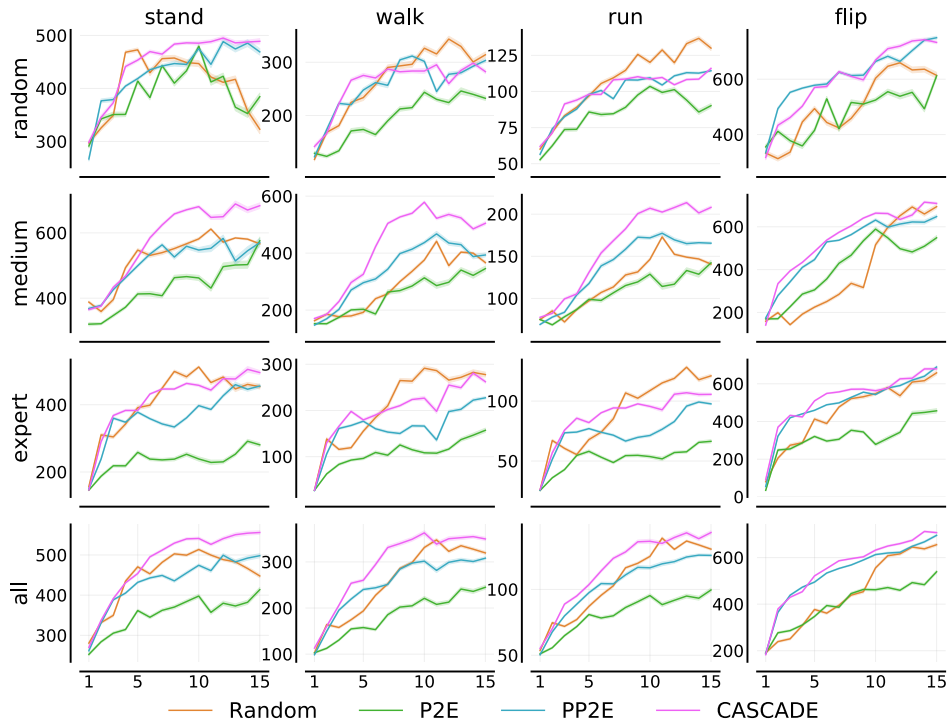

Figure 6: **DMC Zero-Shot Results:** Plots show the performance by environment and dataset, with the last row being the task performance average over all three initial datasets. Plots show the mean and SEM over 10 seeds.

737 Next we show detailed results in three Atari games: Montezuma’s Revenge, Frostbite and Hero  
 738 in Fig. 7. We see that generally CASCADE discovers higher rewarding episodes (almost double  
 739 the next best baseline in Montezuma’s Revenge), and also discovers more rewarding episodes on  
 740 average. This translates to stronger zero-shot performance than all baselines in all three environments.  
 741 On the other hand, the other baselines achieve worse zero-shot performance because they either  
 742 (1) find an occasional high reward episode (Max Episode Return), but not in a sufficient quantity  
 743 (Rewarding Episodes), or (2) collect abundant low rewarding episodes that are less helpful for learning  
 744 good behavior policies. For instance, the random baseline is able to find Rewarding Episodes more  
 745 frequently in Frostbite, but these are relatively low quality, hence the lower curve when assessing its  
 746 Max Episode Return.

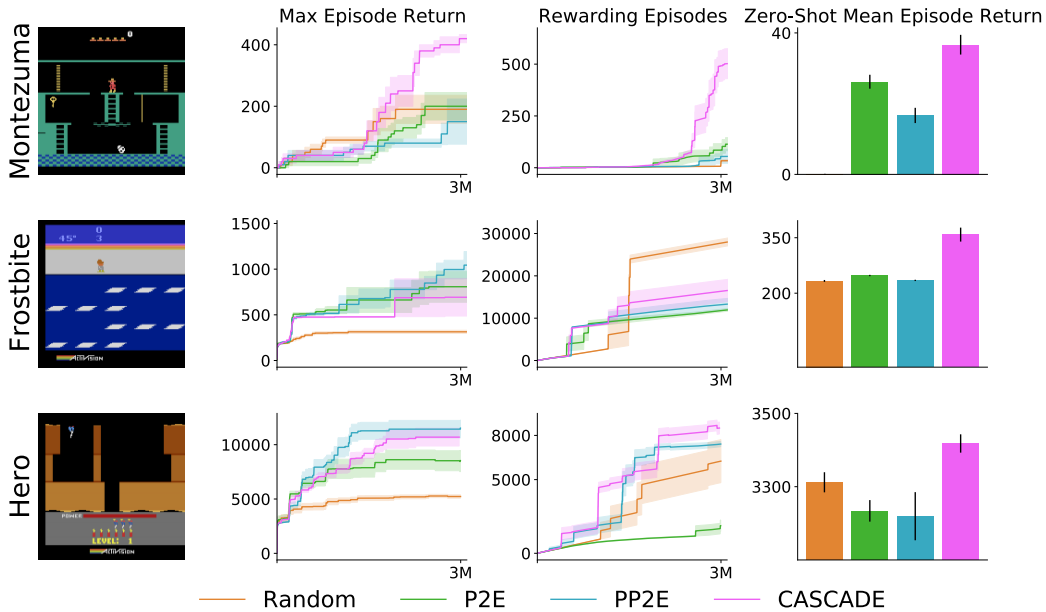

Figure 7: From left to right on each row we show a frame from the game, a plot of the cumulative maximum episode reward, the total number of rewarding episodes discovered and zero-shot average return, from 3M training steps (15 deployments). Plots show mean and SEM over 10 seeds. Note that the max episode returns of all methods stabilize after 15 deployments (3M training steps in total).

747 To understand why CASCADE performs well, in Figure 8 we plot trajectories from Montezuma’s  
 748 Revenge. We see that the inclusion of a diversity-inducing objective does indeed lead to more diverse  
 749 behaviors in the environment, with each policy exploring different regions of the room. In contrast, for  
 750 PP2E, agents 3,4,5,6,7,9 all exhibit very similar behavior, likely indicating that random initialization  
 751 alone is not sufficient to induce diversity when all agents optimize for the same objective.

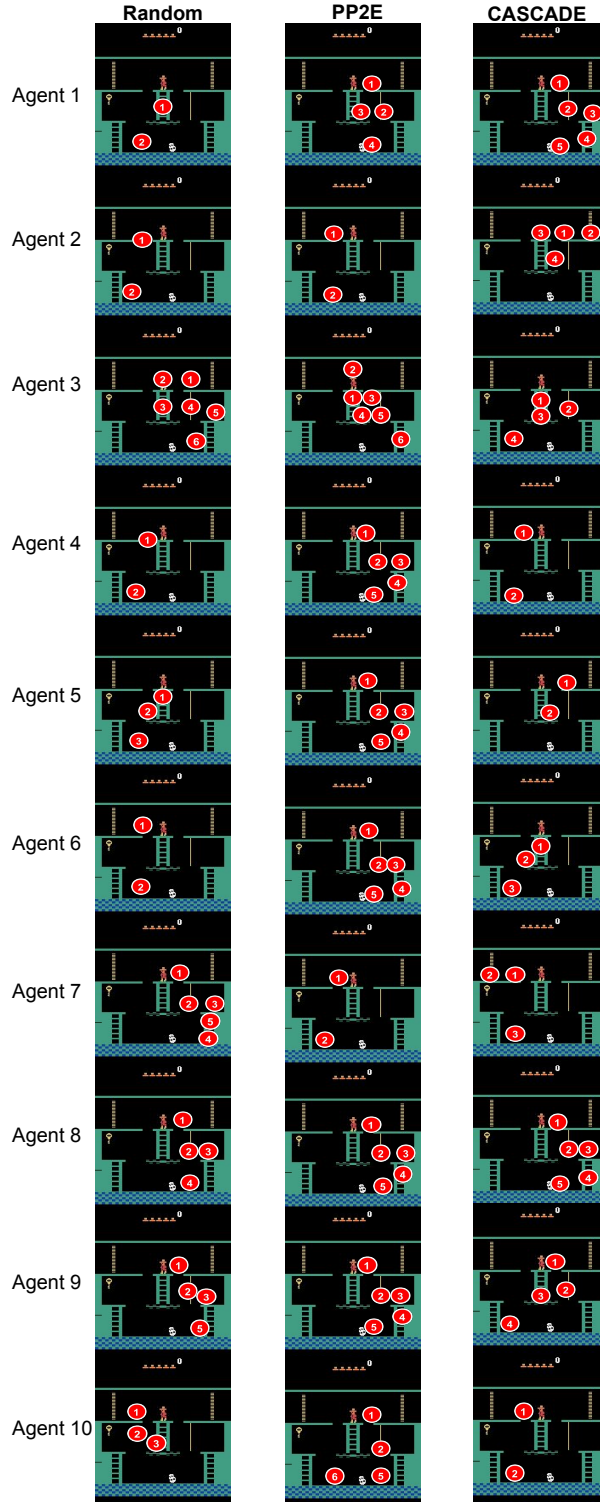

Figure 8: **Trajectories in Montezuma’s Revenge**: Each row shows a trajectory from one of the 10 exploration agents of a model after 3M training timesteps (P2E is omitted because it only has 1 agent.) We can see that PP2E’s agents exhibit the most homogeneous behaviors, and result in trajectories that focus on the bottom right of the room, while CASCADE agents manage to explore more of the room collectively.

752 **B Implementation Details**

753 DreamerV2 consists of an image encoder that uses a Convolutional Neural Network (CNN, [56]), a  
 754 Recurrent State-Space Model (RSSM [38]) that learns the dynamics, and predictors for the image,  
 755 reward, and discount factor. The RSSM uses a sequence of deterministic recurrent states  $h_t$ . At each  
 756 step, it computes a posterior state  $z_t$  conditioned on the current image  $x_t$ , as well as a prior state  $\hat{z}_t$   
 757 without the current image. During world model training, the concatenation of  $h_t$  and  $z_t$  is used to  
 758 reconstruct the current image  $x_t$ , and predict the reward  $r_t$  and discount factor  $\gamma_t$ . Once the world  
 759 model is trained, it can be used to roll out “imaginary” trajectories where the model state is instead  
 760 the concatenation of the deterministic state  $h_t$  and prior stochastic state  $\hat{z}_t$ .

$$\text{RSSM} \begin{cases} \text{Recurrent model:} & h_t = f_\psi(h_{t-1}, z_{t-1}, a_{t-1}) \\ \text{Representation model:} & z_t \sim q_\psi(z_t|h_t, x_t) \\ \text{Transition predictor:} & \hat{z}_t \sim p_\psi(\hat{z}_t|h_t) \end{cases} \quad (7)$$

761

$$\begin{aligned} \text{Image predictor:} & \quad \hat{x}_t \sim p_\psi(\hat{x}_t|h_t, z_t) \\ \text{Reward predictor:} & \quad \hat{r}_t \sim p_\psi(\hat{r}_t|h_t, z_t) \\ \text{Discount predictor:} & \quad \hat{\gamma}_t \sim p_\psi(\hat{\gamma}_t|h_t, z_t). \end{aligned} \quad (8)$$

762 Our implementation (<https://github.com/ainomearod/divwm>) was built on top of the official  
 763 DreamerV2 repository <https://github.com/danijar/dreamerv2>. We used the default hyper-  
 764 parameter values in the DreamerV2 repository. Table 1 lists the additional hyperparameters used in  
 765 our experiments.

766 We also incorporate a latent disagreement ensemble, following Plan2Explore [95]. This involves  
 767 training, alongside the RSSM model, an MLP ensemble with 10 members (each having 4 hidden  
 768 layers, 400 units per layer, and different parameter initializations). These one-step models take action  
 769  $a_t$  and latents  $z_t, h_t$  as inputs, and try to predict the next stochastic latent  $z_{t+1}$ . The variance across  
 770 these outputs during imagined rollouts is then used as the reward signal that forms the Information  
 771 Gain (InfoGain) objective. Note that this ensemble is otherwise unused, and is solely trained for the  
 772 purposes of the exploration objective.

Table 1: CASCADE hyperparameters

| Environment             | Parameter                    | Value                               |
|-------------------------|------------------------------|-------------------------------------|
| MiniGrid-FourRooms      | CASCADE weight ( $\lambda$ ) | 0.1                                 |
|                         | batch size                   | 200k                                |
|                         | deployments                  | 5                                   |
|                         | explorer train steps         | 10k                                 |
|                         | offline model train steps    | 20k                                 |
| MiniGrid-MultiRoom-N4S5 | CASCADE weight ( $\lambda$ ) | 0.3                                 |
|                         | batch size                   | 200k                                |
|                         | deployments                  | 5                                   |
|                         | explorer train steps         | 10k                                 |
|                         | offline model train steps    | 20k                                 |
| Montezuma’s Revenge     | CASCADE weight ( $\lambda$ ) | 0.8                                 |
|                         | batch size                   | 200k                                |
|                         | deployments                  | 15                                  |
|                         | explorer train steps         | 10k                                 |
|                         | offline model train steps    | 5k                                  |
| Walker                  | CASCADE weight( $\lambda$ )  | 0.1 (Random)<br>0.3 (Medium/Expert) |
|                         | batch size                   | 200k                                |
|                         | deployments                  | 2                                   |
|                         | explorer train steps         | 250                                 |
|                         | offline model train steps    | 5k                                  |

## 773 C Deriving the Objective

### 774 C.1 An Information Theoretic Perspective

775 Inspired by [95], we derive a data acquisition objective based on the mutual information between the  
 776 collected data and parameters of the world model  $\mathcal{M}_\psi$ .  $\mathcal{M}_\psi$  can be either stochastic or deterministic,  
 777 and can also be an ensemble of empirical models. **Crucially however, we eschew the reliance on**  
 778 **one-step information gain (as performed in [95]), and instead aim to maximize diversity directly in**  
 779 **the space of trajectories. To do this,** let  $\Phi : \Gamma \rightarrow \Omega$  be an summary function mapping trajectories  
 780 into an embedding ‘summary’ space. For any model  $\mathcal{M}_\psi$  we use the notation  $\mathbb{P}_\pi[\mathcal{M}_\psi]$  to denote  
 781 the distribution over trajectories generated by policy  $\pi$  in  $\mathcal{M}_\psi$  and use  $\mathcal{M}_\psi \sim \mathbb{P}_{\mathcal{M}_\psi}$  to denote the  
 782 posterior distribution over models. The later depends on the data collected so far.

783 In this work we consider different embedding functions  $\Phi$ ,

- 784 1. **Final State Embedding.** In this setting we define  $\Phi(\tau) = h_H$  where  $h_H$  corresponds to  
 785 the  $H$ -th (and last) state embedding in the trajectory  $\tau$ . Since we use an RNN world model,  
 786 the use of this summary embedding is analogous to the final encoder embedding in seq2seq  
 787 language models [101].
- 788 2. **Visitation Frequencies.** In the tabular setting if we define  $\Phi(\tau)$  as a discounted count  
 789 statistic for states in  $\tau$ , we recover  $\mathbb{P}_\pi^\Phi[\mathcal{M}_\psi] = d_{\mathcal{M}_\psi}^\pi$  where  $d_{\mathcal{M}_\psi}^\pi$  corresponds to the  
 790 discounted visitation distribution of policy  $\pi$  in model  $\mathcal{M}_\psi$ .

791 The authors of [95] study a per state-action mutual information objective that informs the construction  
 792 of a greedy mutual information maximizing policy. Implicitly, this per-step objective assumes the  
 793 model to factor in *independent* transition operators pertaining to each state-action pair. This is  
 794 certainly not the case when using powerful function approximators such as neural networks. In  
 795 this case, the dynamics model corresponding to the state transitions of a specific state action pair is  
 796 correlated with the state transition model of *other* state-actions. This is not captured accurately by the  
 797 objective in [95]. Instead, we consider the following choice for an exploratory policy in the single  
 798 policy setting studied in [95]:

$$\pi_{\text{EXP}} = \max_{\pi} \mathcal{I}(\mathbb{P}_\pi^\Phi[\mathcal{M}_\psi]; \mathcal{M}_\psi) = \mathcal{H}(\mathbb{P}_\pi^\Phi[\mathcal{M}_\psi]) - \mathcal{H}(\mathbb{P}_\pi^\Phi[\mathcal{M}_\psi] | \mathcal{M}_\psi). \quad (9)$$

799  $\pi_{\text{EXP}}$  is a policy whose distribution over summaries  $\Phi(\tau)$  with  $\tau \sim \mathbb{P}_\pi[\mathcal{M}_\psi]$  and  $\mathcal{M}_\psi \sim \mathbb{P}_{\mathcal{M}_\psi}$  has  
 800 large entropy, but such that the average entropy of the summaries in every individual model is small.  
 801 The term  $\mathcal{H}(\mathbb{P}_\pi^\Phi[\mathcal{M}_\psi])$  captures the total uncertainty (epistemic + aleatoric) while subtracting the  
 802 conditional entropy removes the aleatoric uncertainty resulting from noise within the model and the  
 803 policy.

804 To gain intuition about this objective, consider the case where  $\Phi$  equals the *final state embedding*.  
 805 For simplicity, we consider the scenario when all models  $\mathcal{M}_\psi \sim \mathbb{P}$  and all policies  $\pi \sim \Pi$  are such  
 806 that for any realization of  $\mathcal{M}_\psi = m_\psi$ , the conditional entropy  $\mathcal{H}(\mathbb{P}_\pi^\Phi[\mathcal{M}_\psi] | \mathcal{M}_\psi = m_\psi) = \sigma(m_\psi)$   
 807 is a function of the world  $m_\psi$  and not of the policy. In this case, the policy  $\pi_{\text{EXP}}$  is the entropy  
 808 maximizing policy:

$$\pi_{\text{EXP}} = \max_{\pi} \mathcal{H}(\mathbb{P}_\pi^\Phi[\mathcal{M}_\psi]).$$

809 The scenario above is realized for example when all models  $\mathcal{M}_\psi \sim \mathbb{P}_{\mathcal{M}_\psi}$  are deterministic and all  
 810 policies in  $\Pi$  are deterministic. In this case, for every realization of  $\mathcal{M}_\psi = m_\psi$ , the conditional  
 811 entropy  $\mathcal{H}(\mathbb{P}_\pi^\Phi[\mathcal{M}_\psi] | \mathcal{M}_\psi = m_\psi) = 0$ . The assumption  $\mathcal{H}(\mathbb{P}_\pi^\Phi[\mathcal{M}_\psi] | \mathcal{M}_\psi = m_\psi) = \sigma(w)$  is  
 812 also realized when the distribution  $\Phi(\tau) \sim \mathbb{P}_\pi^\Phi[m_\psi]$  is approximated as a Gaussian distribution  
 813  $\mathbb{P}_\pi^\Phi[m_\psi] \approx \mathcal{N}(\mu(m_\psi, \pi), \Sigma(m_\psi))$  with policy dependent mean  $\mu(m_\psi, \pi)$  and policy independent  
 814 covariance  $\Sigma(m_\psi)$ .

815 In these cases  $\pi_{\text{EXP}}$  is the policy that produces the most diverse distribution over final states across  
 816 the posterior distribution over models  $\mathbb{P}_{\mathcal{M}_\psi}$ . Since access to  $\mathcal{H}(\mathbb{P}_\pi^\Phi[\mathcal{M}_\psi])$  may not be possible,  
 817 in our experiments we make further approximations inspired by [95]. Under the same gaussian  
 818 approximation  $\mathbb{P}_\pi^\Phi[m_\psi] \approx \mathcal{N}(\mu(m_\psi, \pi), \Sigma(m_\psi))$ , optimizing  $\max_{\pi} \mathcal{H}(\mathbb{P}_\pi^\Phi[\mathcal{M}_\psi])$  is achieved by

819 finding the policy  $\pi$  that makes the ensemble means  $\mu(m_\psi, \pi)$  as far apart as possible. A suitable  
 820 surrogate for this objective is to maximize the empirical variance over means,

$$\text{Var}(\pi) = \frac{1}{|\mathcal{M}_\psi| - 1} \sum_{m_\psi} \|\mu(m_\psi, \pi) - \mu'(\pi)\|^2$$

821 where  $|\mathcal{M}_\psi|$  denotes the number of samples  $m_\psi$ , and  $\mu'(\pi) = \frac{1}{|\mathcal{M}_\psi|} \sum_{m_\psi} \mu(m_\psi, \pi)$ . We now  
 822 consider a ‘‘batch’’ version of Eq. 9 involving a population of  $B$  agents:

$$\begin{aligned} \{\pi_{\text{EXP}}^{(i)}\}_{i=1}^B &= \max_{\pi^{(1)}, \dots, \pi^{(B)} \in \Pi^B} \mathcal{I} \left( \prod_{i=1}^B \mathbb{P}_{\pi^{(i)}}^\Phi [\mathcal{M}_\psi]; \mathcal{M}_\psi \right) = \\ & \mathcal{H} \left( \prod_{i=1}^B \mathbb{P}_{\pi^{(i)}}^\Phi [\mathcal{M}_\psi] \right) - \mathcal{H} \left( \prod_{i=1}^B \mathbb{P}_{\pi^{(i)}}^\Phi [\mathcal{M}_\psi] \middle| \mathcal{M}_\psi \right) \end{aligned} \quad (10)$$

823 where  $\prod_{i=1}^B \mathbb{P}_{\pi^{(i)}}^\Phi [\mathcal{M}_\psi]$  is the product measure of the candidate policies embedding distributions  
 824 over the model  $\mathcal{M}_\psi$ . By definition the conditional entropy factors as,

$$\mathcal{H} \left( \prod_{i=1}^B \mathbb{P}_{\pi^{(i)}}^\Phi [\mathcal{M}_\psi] \middle| \mathcal{M}_\psi \right) = \sum_{i=1}^B \mathcal{H} \left( \mathbb{P}_{\pi^{(i)}}^\Phi [\mathcal{M}_\psi] \middle| \mathcal{M}_\psi \right). \quad (11)$$

825 The objective in Eq. 10 has a similar interpretation as in the single policy case. We are hoping to find  
 826 a set of policies whose average conditional entropies are small (Eq. 4), but whose total entropies are  
 827 large. **Intuitively, we see this objective is more amenable to our population of policies. Concretely, by**  
 828 **considering distributions directly over the space of trajectories, we ensure that each agent does not**  
 829 **‘double count’ the explored states under Eq. 10, whereas applying the same principal to a one-step**  
 830 **information gain objective would simply ensure diversity *conditioned* on that state and action, and**  
 831 **doesn’t explicitly ensure diversity in the visited states by the population.**

### 832 C.1.1 Proof of Lemma 1

833 In the proof of Lemma 1 we will make use of the following supporting result,

834 **Lemma 3.** *Let  $p \in (0, 1]$  and  $p_1, p_2 > 0$  satisfying  $p_1 + p_2 = p$  then,*

$$p \log(1/p) < p_1 \log(1/p_1) + p_2 \log(1/p_2).$$

835 *Proof.* Let  $p_1 = \alpha p$  with  $\alpha \neq 0, 1$ , then,

$$\begin{aligned} p_1 \log(1/p_1) + p_2 \log(1/p_2) &= \alpha p \log(1/(\alpha p)) + (1 - \alpha) p \log(1/((1 - \alpha)p)) \\ &= p \log(1/p) + p \underbrace{\left( \alpha \log(1/\alpha) + (1 - \alpha) \log(1/(1 - \alpha)) \right)}_{>0} \\ &> p \log(1/p). \end{aligned}$$

836 □

837 Lemma 3 implies the following result,

838 **Lemma 4.** *Let  $\mathbf{p} \in [0, 1]^K$  be a vector satisfying  $\sum_{i=1}^K \mathbf{p}_i = 1$  and let  $\mathcal{C}$  be a partition of  $[K]$  such*  
 839 *that  $|\mathcal{C}| \leq K - 1$ . For all  $C \in \mathcal{C}$  denote  $\mathbf{p}(C) = \sum_{i \in C} \mathbf{p}_i$ . The following inequality holds,*

$$\sum_{C \in \mathcal{C}} \mathbf{p}(C) \log(1/\mathbf{p}(C)) \leq \sum_{i=1}^K \mathbf{p}_i \log(1/\mathbf{p}_i).$$

840 If  $\mathbf{p}_i > 0$  the inequality is strict,

$$\sum_{C \in \mathcal{C}} \mathbf{p}(C) \log(1/\mathbf{p}(C)) < \sum_{i=1}^K \mathbf{p}_i \log(1/\mathbf{p}_i).$$

841 *Proof.* W.l.o.g we call  $C_1$  the partition set containing 1 and assume  $\mathbf{p}_1 > 0$ . If  $\mathbf{p}_i > 0$  for only one  
842 element of  $C_1$ , it must be the case that  $\mathbf{p}_1 \log(1/\mathbf{p}_1) = \mathbf{p}_{C_1} \log(1/\mathbf{p}_{C_1})$ .

843 We now assume that  $|C_1| > 1$  and that  $C_1$  has at least two indices  $i \neq j$  such that  $\mathbf{p}_i, \mathbf{p}_j > 0$ . Let  
844  $l$  denote the size of  $C_1$  and w.l.o.g. let's say  $C_1 = \{1, 2, \dots, l\}$ . Lemma 3 implies the following  
845 inequalities,

$$\begin{aligned} \mathbf{p}(C_1) \log(1/\mathbf{p}(C_1)) &< \mathbf{p}_1 \log(1/\mathbf{p}_1) + \mathbf{p}(C_1 \setminus \{1\}) \log(1/\mathbf{p}(C_1 \setminus \{1\})) \\ &< \dots \\ &< \sum_{i \in C_1} \mathbf{p}_i \log(1/\mathbf{p}_i). \end{aligned}$$

846 Applying this reasoning to each element in the partition  $\mathcal{C}$  yields the desired result.

847 □

848 **Lemma 1.** *When all models  $\mathcal{M}_\psi$  in the support of the model posterior are deterministic and tabular,*  
849 *and the space of policies  $\Pi$  consists only of deterministic policies, there always exists a solution*  
850  *$\{\pi_{\text{EXP}}^{(i)}\}_{i=1}^B$  satisfying  $\pi_{\text{EXP}}^{(i)} \neq \pi_{\text{EXP}}^{(j)} \forall i \neq j$ . Moreover, there exists a family of tabular MDP models,*  
851 *such that the maximum cannot be achieved by setting  $\pi_{\text{EXP}}^{(i)} = \pi$  for a fixed  $\pi$ .*

852 *Proof.* First let's observe that when the models and policies are all deterministic, the conditional  
853 entropies satisfy,

$$\mathcal{H} \left( \prod_{i=1}^B \mathbb{P}_{\pi^{(i)}}^\Phi[\mathcal{M}_\psi] \middle| \mathcal{M}_\psi \right) = \sum_{i=1}^B \mathcal{H} \left( \mathbb{P}_{\pi^{(i)}}^\Phi[\mathcal{M}_\psi] \middle| \mathcal{M}_\psi \right) = 0.$$

854 We assume the set of policies  $\Pi$  is of size at least  $B$ . Otherwise, the result cannot be true. The first  
855 result follows immediately by Lemma 4. For any fixed  $\pi$ , the product distribution  $\prod_{i=1}^B \mathbb{P}_\pi^\Phi[\mathcal{M}_\psi]$  is a  
856 distribution over 'diagonal' tuples of the form  $\underbrace{(b, \dots, b)}_{\text{size } B}$  where  $b$  is an embedding.

857 Consider an arbitrary set of policies  $\pi^{(2)}, \dots, \pi^{(B)}$  satisfying  $\pi^{(i)} \neq \pi^{(j)} \neq \pi$  for all  $i, j \in$   
858  $\{2, \dots, K\}$ . Call  $\pi^{(1)} = \pi$ . The distribution over embeddings induced by the product distribution  
859  $\prod_{i=1}^B \mathbb{P}_{\pi^{(i)}}^\Phi[\mathcal{M}_\psi]$  is made of tuples of the form  $(b_1, \dots, b_B)$ . Call  $\mathbf{p}(b_1, \dots, b_B)$  the probability un-  
860 der the product measure  $\prod_{i=1}^B \mathbb{P}_{\pi^{(i)}}^\Phi[\mathcal{M}_\psi]$  of the tuple  $(b_1, \dots, b_B)$ . Notice the 'projection measure'  
861 onto the first coordinate satisfies

$$\prod_{i=1}^B \mathbb{P}_{\pi^{(i)}}^\Phi[\mathcal{M}_\psi](b_1) = \prod_{i=1}^B \mathbb{P}_\pi^\Phi[\mathcal{M}_\psi](b_1, \dots, b_1) := \mathbf{p}_1(b_1)$$

862 and that  $\sum_{b_2, \dots, b_K} \mathbf{p}(b_1, b_2, \dots, b_K) = \mathbf{p}_1(b_1)$ . This induces a partition over the outcome space  
863  $(b_1, \dots, b_K)$  corresponding to  $C(b_1) = \{(b_1, b_2, \dots, b_K)\}_{b_2, \dots, b_K}$ .

864 A direct use of Lemma 4 implies the entropy of the product distribution over finer grained tuples  
865 is larger than the entropy over the diagonal of the product distribution having all coordinates equal  
866 to each other. In fact this result also informs when the inequality will be strict. This happens when  
867 (for example the measure over  $\mathcal{M}_\psi$  is the counting measure) there exists two worlds  $\mathcal{M}_\psi^{(1)}$  and  
868  $\mathcal{M}_\psi^{(2)}$  such that the embedding tuples  $(b_1^{(1)}, \dots, b_B^{(1)})$  and  $(b_1^{(2)}, \dots, b_B^{(2)})$  satisfy  $b_1^{(1)} = b_1^{(2)}$  and  
869  $(b_2^{(1)}, \dots, b_B^{(1)}) \neq (b_2^{(2)}, \dots, b_B^{(2)})$ .

870 We will use this observation to prove the second claim. Consider a family of MDPs formed of depth  
 871  $L$  binary trees. In this family, the paths leading to the  $L - 1$  layer are the same, but the connections  
 872 from layer  $L - 1$  to layer  $L$  are unknown. The ‘posterior’ distribution is assumed to be uniform over  
 873 all plausible trees. Layer  $L - 1$  has size  $2^{L-1}$  and layer  $L$  has size  $2^L$ . W.l.o.g. we assume the set of  
 874 nodes in layer  $L$  is labeled as  $[1, 2, \dots, 2^L]$ . The distribution over models is supported over the set  
 875 of partitions of size  $2^{L-1}$  of  $[1, \dots, 2^L]$  where each partition set has size 2. We assume  $2^L \geq B$  so  
 876 that there are at least  $B$  distinct policies.

877 Let  $\pi$  be a fixed policy. It is enough to show there exist two worlds  $\mathcal{M}_\psi^{(1)}$  and  $\mathcal{M}_\psi^{(2)}$  such that policy  
 878  $\pi$  ends in the same state for both  $\mathcal{M}_\psi^{(1)}$  and  $\mathcal{M}_\psi^{(2)}$  but that there exist distinct policies  $\pi^{(2)}, \dots, \pi^{(B)}$   
 879 such that their endpoints  $(b_2^{(1)}, \dots, b_B^{(1)})$  and  $(b_2^{(2)}, \dots, b_B^{(2)})$  in worlds  $\mathcal{M}_\psi^{(1)}$  and  $\mathcal{M}_\psi^{(2)}$  satisfy  
 880  $(b_2^{(1)}, \dots, b_B^{(1)}) \neq (b_2^{(2)}, \dots, b_B^{(2)})$ . The latter always holds because among the set of models that  
 881 maintain the same endpoint for  $\pi$ , there is a pair of models that has different endpoints for  $\pi^{(2)}$  for  
 882 any arbitrary  $\pi^{(2)} \neq \pi$ . This suffices to show the entropy of the ensemble of distinct policies is  
 883 strictly larger than the entropy of the ‘diagonal choice’  $\underbrace{(\pi, \dots, \pi)}_{\text{size } B}$ .

884

□

### 885 C.1.2 InfoCascade

886 Since the mutual information objective in Eq. 3 is submodular, a simple greedy algorithm yields a  
 887  $(1 - \frac{1}{e})$  approximation of the optimum [72]. This is the same observation that gives rise to the greedy  
 888 algorithm underlying other batch exploration objectives, such as in BatchBALD [51].

889 Let’s start by assuming we have candidate policies  $\pi^{(1)}, \dots, \pi^{(i-1)}$ . InfoCascade selects  $\pi^{(i)}$  based  
 890 on the following greedy objective,

$$891 \begin{aligned} \pi^{(i)} &= \arg \max_{\tilde{\pi}^{(i)} \in \Pi} \mathcal{I} \left( \prod_{j=1}^i \mathbb{P}_{\tilde{\pi}^{(j)}}^\Phi [\mathcal{M}_\psi]; \mathcal{M}_\psi \mid \tilde{\pi}^{(j)} = \pi^{(j)} \quad \forall j \leq i-1 \right) \\ &= \mathcal{H} \left( \prod_{j=1}^i \mathbb{P}_{\tilde{\pi}^{(j)}}^\Phi [\mathcal{M}_\psi] \mid \tilde{\pi}^{(j)} = \pi^{(j)} \quad \forall j \leq i-1 \right) - \mathcal{H} \left( \prod_{j=1}^i \mathbb{P}_{\pi^{(j)}}^\Phi [\mathcal{M}_\psi] \mid \mathcal{M}_\psi, \tilde{\pi}^{(j)} = \pi^{(j)} \quad \forall j \leq i-1 \right). \end{aligned}$$

892 Equation 4 implies

$$893 \mathcal{H} \left( \prod_{j=1}^i \mathbb{P}_{\pi^{(j)}}^\Phi [\mathcal{M}_\psi] \mid \mathcal{M}_\psi, \tilde{\pi}^{(j)} = \pi^{(j)} \quad \forall j \leq i-1 \right) = \sum_{j=1}^i \mathcal{H} \left( \mathbb{P}_{\pi^{(i)}}^\Phi [\mathcal{M}_\psi] \mid \mathcal{M}_\psi \right) \quad (12)$$

893 and therefore if we approximate  $\mathbb{P}_\pi^\Phi [m_\psi]$  by a Gaussian  $\mathbb{P}_\pi^\Phi [m_\psi] \approx \mathcal{N}(\mu(m_\psi, \pi), \Sigma(m_\psi))$ , the  
 894 conditional entropy becomes a policy independent term. In this case finding  $\pi^{(i)}$  boils down to  
 895 solving for the policy that maximizes  $\mathcal{H} \left( \prod_{j=1}^i \mathbb{P}_{\pi^{(j)}}^\Phi [\mathcal{M}_\psi] \mid \pi^{(1)}, \dots, \pi^{(i-1)} \right)$ . Using the same  
 896 approximations described for the single policy objective, a suitable surrogate for this objective is  
 897 to maximize  $\max_\pi \text{Var}(\pi \mid \pi^{(1)}, \dots, \pi^{(i-1)})$ , the empirical variance over means with respect to the  
 898 policies found so far  $\{\pi^{(j)}\}_{j=1}^{i-1}$ ,

$$\begin{aligned} \text{Var}(\pi \mid \pi^{(1)}, \dots, \pi^{(i-1)}) &= \\ &= \frac{1}{|\mathcal{M}_\psi| |i| - 1} \sum_{m_\psi} \sum_{\tilde{\pi} \in \{\pi^{(1)}, \dots, \pi^{(i-1)}, \pi\}} \|\mu(m_\psi, \tilde{\pi}) - \mu'(\pi, \pi^{(1)}, \dots, \pi^{(i-1)})\|^2 \end{aligned}$$

899 Where  $\mu'(\pi, \pi^{(1)}, \dots, \pi^{(i-1)}) = \frac{1}{|\mathcal{M}_\psi| |i|} \sum_{m_\psi} \sum_{\tilde{\pi} \in \{\pi^{(1)}, \dots, \pi^{(i-1)}, \pi\}} \mu(m_\psi, \tilde{\pi})$ .



900 **D Theoretical RL Intuition**

901 The problem we study in this work can be thought of as the “batch” version of the Reward Free  
 902 Exploration formalism [44]. In this setting, the learner interacts with an MDP in two phases: 1) a  
 903 training phase, where it is allowed to collect data from the environment; 2) a test phase, where the  
 904 learner is presented with an arbitrary task (parametrized by a reward function unseen during training)  
 905 and it must produce a near optimal policy. When faced with this problem, the learner is required  
 906 to design a careful exploration strategy that permits them to build an accurate model in all areas of  
 907 the state-space that can be reached with sufficient probability. There have been multiple follow up  
 908 works that have also studied this problem in the context of Linear MDPs [113] and neural function  
 909 approximation [85]. Nonetheless, there has been limited focus on the batch setting, where the learner  
 910 is required to collect data via parallel data gathering policies in each training phase.

911 Due to the adaptive nature of the algorithm (every single environment query uses all information  
 912 collected so far), there is an inevitable drop in performance when moving from the sequential (   
 913 fully online) setting to the batch (deployment efficient) setting, as measured by the total number of  
 914 environment interactions (in our case,  $T \times B$  where  $T$  is the number of training rounds and  $B$  the  
 915 number of parallel collection policies). To illustrate how CASCADE mitigates this loss in sample-  
 916 efficiency, we outline the pseudo-code of CASCADE-TS, a greedy Thompson Sampling algorithm  
 917 (see [4]) that produces the  $i$ -th batch exploration policy in a tabular environment by incorporating  
 918 fake count data from rolling out policies  $\pi^{(1)}, \dots, \pi^{(i-1)}$  in the model. In the algorithms we present  
 919 in the main body, we incorporate data gathered in the model by previous  $i - 1$  selected policies into  
 920 the batch when building the  $i$ -th exploration policy; this is directly related to the approach behind  
 921 CASCADE-TS. Concretely, encouraging policy  $\pi^{(i)}$  to induce a high variance among the embeddings  
 922 produced by  $\{\pi^{(1)}, \dots, \pi^{(i-1)}\}$  can be thought as adding a bonus to encourage  $\pi^{(i)}$  to visit regions of  
 923 the space that have a low embedding visitation count by the previous policies in  $\{\pi^{(1)}, \dots, \pi^{(i-1)}\}$ .

---

**Algorithm 2** CASCADE-TS

---

- 1: **Input:** Exploration batch size  $B$ . Fake samples parameter  $M$ .
  - 2: Initialize model  $\hat{\mathbb{P}}_0$  over  $\mathcal{S} \times \mathcal{A}$  state actions.
  - 3: Initialize the batch collection policies as  $\{\pi_0^{(i)}\}_{i=1}^B$  to uniform.
  - 4: **for** time in  $k = 0, 1, 2, \dots$  **do**
  - 5:   Collect trajectory data  $\{\tau_k^{(i)}\}_{i=1}^B$  from  $\pi_k^{(i)}$  for all  $i = 1, \dots, B$ . Update  $\mathcal{D}^{k+1} \leftarrow \mathcal{D}^k \cup \{\tau_k^{(i)}\}_{i=1}^B$ .
  - 6:   Initialize the fake data buffer  $\mathcal{D}_{\text{fake}}^{k+1} = \emptyset$ .
  - 7:   **for**  $i = 1, \dots, B$  **do**
  - 8:     Sample MDP model from posterior  $\tilde{\mathbb{P}}_{k+1}^{(i)} \sim \mathbb{P}(\cdot | \mathcal{D}^{k+1} \cup \mathcal{D}_{\text{fake}}^{k+1})$ .
  - 9:     Compute fake counts  $N_{k+1}^{(i)}(s, a) = \sum_{(\tilde{s}, \tilde{a}, \tilde{s}') \in \mathcal{D}^{k+1} \cup \mathcal{D}_{\text{fake}}^{k+1}} \mathbf{1}(\tilde{s} = s, \tilde{a} = a)$ .
  - 10:     Compute fake uncertainty bonuses  $b_{k+1}^{(i)}(s, a) \propto \sqrt{\frac{1}{N_{k+1}^{(i)}(s, a)}}$
  - 11:     Solve for  $\pi_{k+1}^{(i)}$  by solving,
 
$$\pi_{k+1}^{(i)} = \max_{\pi} \mathbb{E}_{\tau \sim \tilde{\mathbb{P}}_{k+1}^{(i)}, \pi} \left[ \sum_{h=1}^H b_{k+1}^{(i)}(s_h, a_h) \right]$$
  - 12:     Collect fake trajectory data  $\{\tau_{\ell, \text{fake}}^{(i)}\}_{\ell=1}^M$  from posterior sampled model  $\tilde{\mathbb{P}}_{k+1}^{(i)}$ .
  - 13:     Update fake data buffer  $\mathcal{D}_{\text{fake}}^{k+1} \leftarrow \mathcal{D}_{\text{fake}}^{k+1} \cup \{\tau_{\ell, \text{fake}}^{(i)}\}_{\ell=1}^M$ .
  - 14:   **end for**
  - 15: **end for**
- 

924 Algorithm 2 works by sampling a model from a model posterior, solving for an optimal uncertainty  
 925 seeking policy and updating the model with ‘fake’ data corresponding to trajectories collected in  
 926 the model from this uncertainty seeking policy. After producing the  $i$ -th exploration policy in the  
 927 batch, the recomputed uncertainty bonuses of the model are reduced in the areas of the state space

928 most visited by the  $i$ -th policy. This will encourage subsequent uncertainty seeking policies (i.e.,  
 929  $\pi_{k+1}^{(i+1)}, \pi_{k+1}^{(i+2)}, \dots, \pi_{k+1}^{(B)}$ ) to visit parts of the space not yet explored by previous policies.

930 **Why Thompson Sampling?** The reader may wonder why Algorithm 2 samples a model  $\tilde{\mathbb{P}}_{k+1}^{(i)}$  from  
 931 a TS posterior instead of using the empirical model resulting from fake and true data. The answer is  
 932 that the raw empirical model may ascribe a probability of zero to certain transitions, which means  
 933 we may miss exploring parts of the true state-action space. Having a TS prior that ascribes non-zero  
 934 probabilities to all possible transitions fixes this potential issue.

### 935 D.1 Proof of Lemma 2

936 Let's consider the class of deterministic MDPs with  $S = |\mathcal{S}|$  states and  $A = |\mathcal{A}|$  actions. It is  
 937 clear that playing the same deterministic policy multiple times does not provide us with any more  
 938 information than playing it once. We will then show that running Thompson TS, the learner will end  
 939 up with a nonzero probability of producing at least two distinct policies within a batch of size  $B > 2$ .

940 We will further assume the posterior is aware of the deterministic nature of the MDP family so that  
 941 any sample MDP model  $\tilde{\mathbb{P}}_{k+1}^{(i)}$  is deterministic. For  $i > 1$ , the model  $\tilde{\mathbb{P}}_{k+1}^{(i)}$  is one whose transitions  
 942 are consistent with the fake data generated by  $\pi_{k+1}^{(1)}, \dots, \pi_{k+1}^{(i-1)}$  (and the true data in  $\mathcal{D}^k$ ).

943 A deterministic MDPs can be encoded as a set of triplets  $(s, a, s')$ . We say a model  
 944  $\{(s, a, s')\}_{s \in \mathcal{S}, a \in \mathcal{A}}$  is  $\epsilon$ -accurate if at least a fraction of  $1 - \epsilon$  of the triplets are correct.

945 We now illustrate how the CASCADE-TS algorithm evolves in this setting. To simplify our task, we  
 946 will further restrict our attention to the family of deterministic MDPs made of binary trees of height  
 947  $L$ . The number of nodes in any of such trees equals  $2^{L+1} - 1$ . We will define the counts to be a large  
 948 value ( $2L$ ) when no data has been collected of a given state action pair. When data has been collected,  
 949 we define the bonus terms to be of order at most 1.

950 To figure out the connectivity of any such trees it is necessary to try out  $2^L - 1$  distinct sequences  
 951 of  $L$  actions (the nature and connectivity of the remaining leaf nodes can be inferred once all the  
 952 other ones have been decoded). To build an  $\epsilon$ -accurate model, it is enough to know the connectivity  
 953 structure of  $1 - \epsilon$  proportion of paths corresponding to  $(1 - \epsilon)(2^L - 1)$  leaf nodes.

954 To prove the result of Lemma 2, we observe that any batch strategy can be simulated by a fully  
 955 sequential learner, so it immediately follows that  $T(\epsilon, \text{Sequential}) \leq T(\epsilon, \text{AnyBatchStrategy})$ . To  
 956 show that CASCADE-TS will be better than SinglePolicyBatch in this tree example, as long as  $B$  is  
 957 smaller than the remaining number of paths the learner has not tried out, it will produce a set of  $B$   
 958 policies different from any policy played so far and also different from each other.

959 To see why the second inequality is true, it is enough to see that complete paths (real or imagined)  
 960 have a total reward score of at most  $L$ , since the counts are always at most one for each edge that  
 961 is present. Nonetheless, the counts over any path (sequence of  $L$  actions) that has not been visited  
 962 nor has been imagined to be visited will be at least  $2L$ . Thus, every step in the sequential batch  
 963 construction mechanism will produce a new policy (sequence of  $L$  actions) not existent neither in  
 964 the true nor the fake data so far. This finalizes the proof. Notice that the SinglePolicyBatch strategy  
 965 will have tried only  $K$  unique paths after  $K$  batches have been collected, whereas the CASCADE-TS  
 966 strategy will have tried  $BK$ , resulting in a potentially substantial improvement in sample efficiency.
